# Supplementary material for: Establishment of PIVKA-Ⅱ Reference Intervals From Hospital-stored Data: A Comparison Analysis
Source: Research Square preprint supplement (doi:10.21203/rs.3.rs-1040511/v1), 2021-11-30
Supplement: Supplementary file 1 [file e79698d56fae0850476f6890.docx]

Table 4: PIVKA-II (mAU/mL) indirect reference intervals with KOSMIC.

| Gender | Expectation of | Variance of | truncation interval T | of Box-Cox  -transformation | 95% RIs  (mAU/mL) |
| --- | --- | --- | --- | --- | --- |
| Both | 3.9300 | 0.3904 | 16.0~37.9 | 0.1300 | 0~36.17 |
| M | 3.2511 | 0.2656 | 16.0~38.9 | 0.0100 | 0~37.40 |
| F | 12.7455 | 2.1943 | 18.0~36.9 | 0.7400 | 0~32.35 |
