# Supplementary material for: Establishment of PIVKA-Ⅱ Reference Intervals From Hospital-stored Data: A Comparison Analysis
Source: Research Square preprint supplement (doi:10.21203/rs.3.rs-1040511/v1), 2021-11-30
Supplement: Supplementary file 3 [file fdf66c956a6acf7a721076f5.docx]

Table 3: PIVKA-II indirect reference intervals with EM algorithm-based method (EMBCT).

| Gender | Expectation of | Variance of | of | 95% RIs  mAU/mL | Manufacturer RI |
| --- | --- | --- | --- | --- | --- |
| Both | 19.1427 | 4.1278 | 0.9451 | 0~30.78 | 0~40 |
| M | 18.8710 | 4.0554 | 0.9373 | 0~30.92 | 0~40 |
| F | 19.2510 | 4.1527 | 0.9491 | 0~30.65 | 0~40 |
